# Supplementary material for: Trauma-Associated Sleep Disturbances among Women: A Nationwide Study
Source: Research Square preprint supplement (doi:10.21203/rs.3.rs-6733075/v1), 2025-07-11
Supplement: Supplementary file 1 [file 005830f80a229b30f7cf29c8.pdf]

## Supplementary

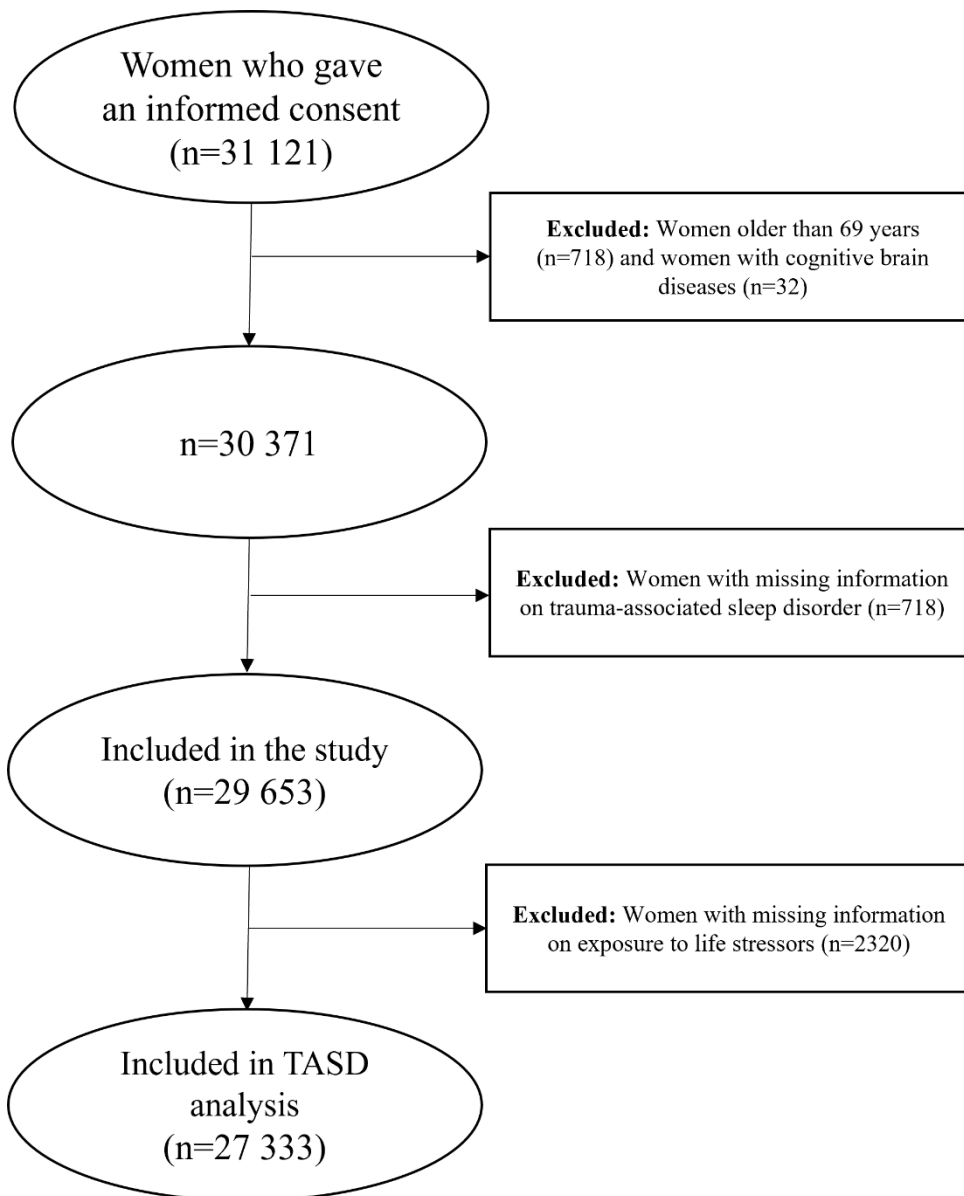

**Figure S1.** Flowchart of women participating in the study.

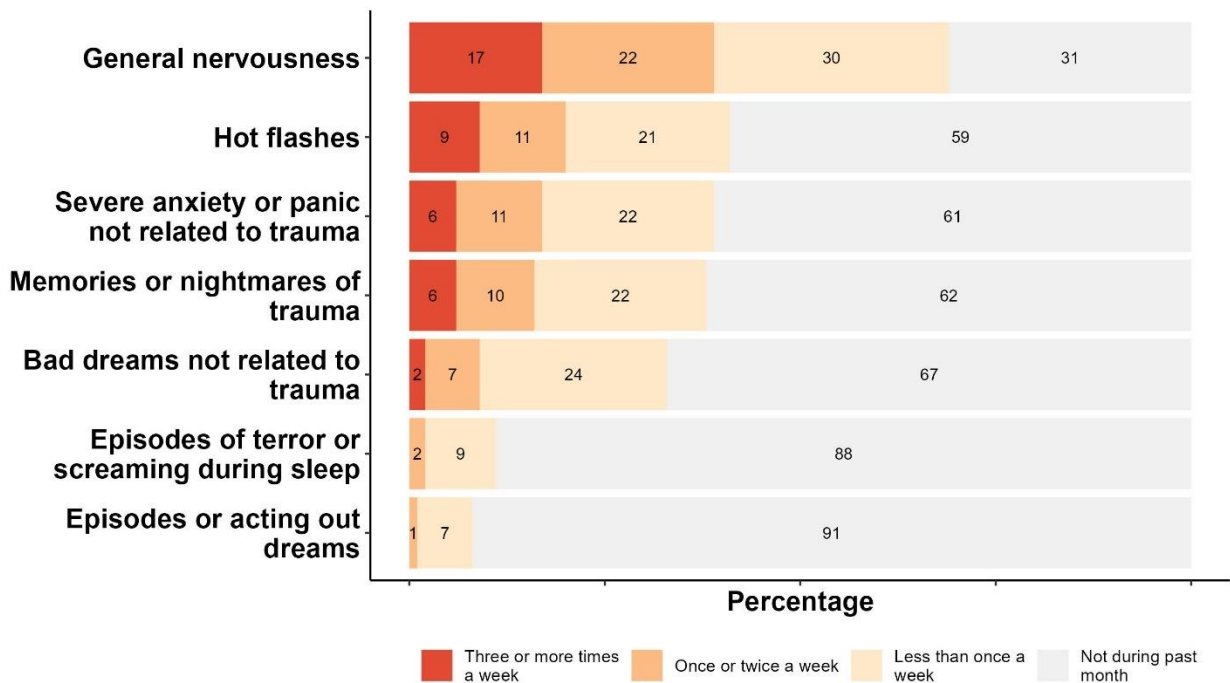

**Figure S2.** Prevalence of the past month of individual items on the PSQI-A. Note: Values <1 are not displayed in the figure. PSQI-A = The Pittsburgh Sleep Quality Index Addendum for PTSD.

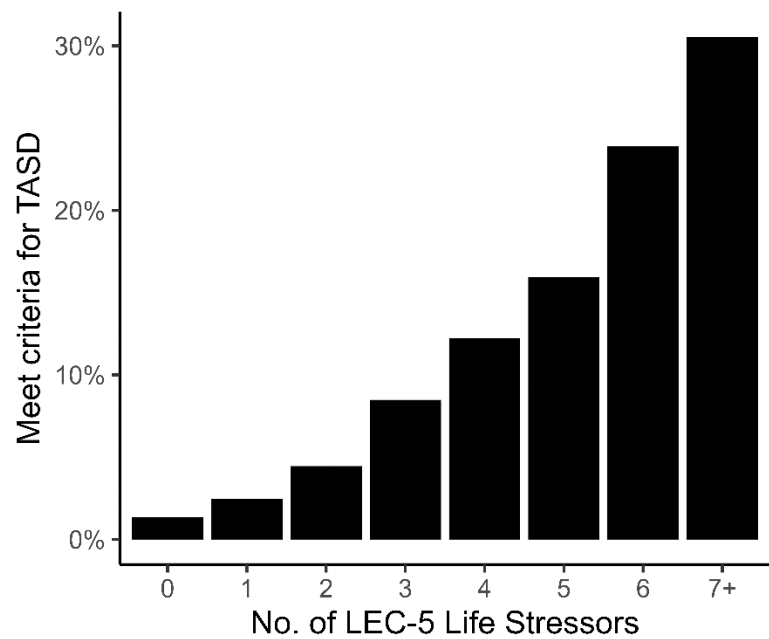

**Figure S3.** Association of the number of LEC-5 life stressors and TASD.

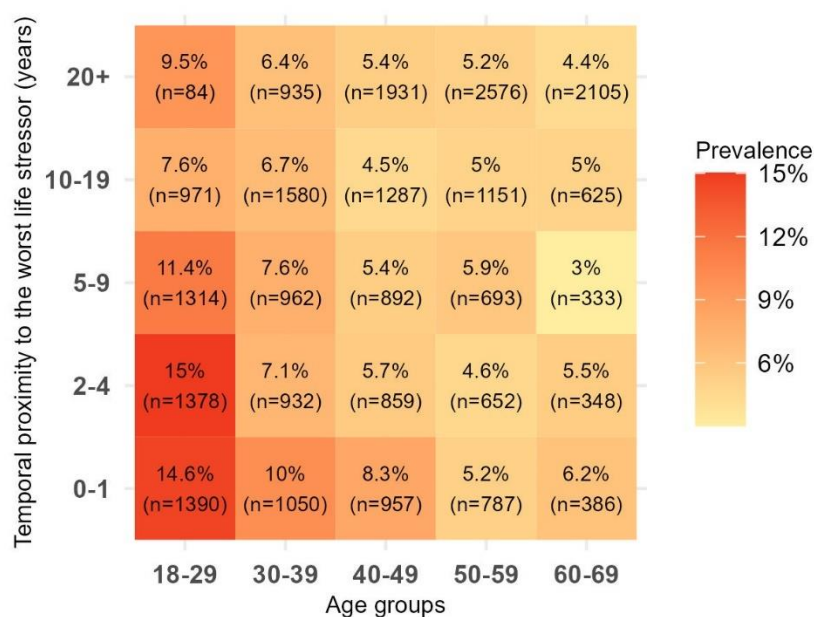

**Figure S4.** Heatmap illustrating the prevalence of TASP across age groups and temporal proximity to worst life stressor (in years).

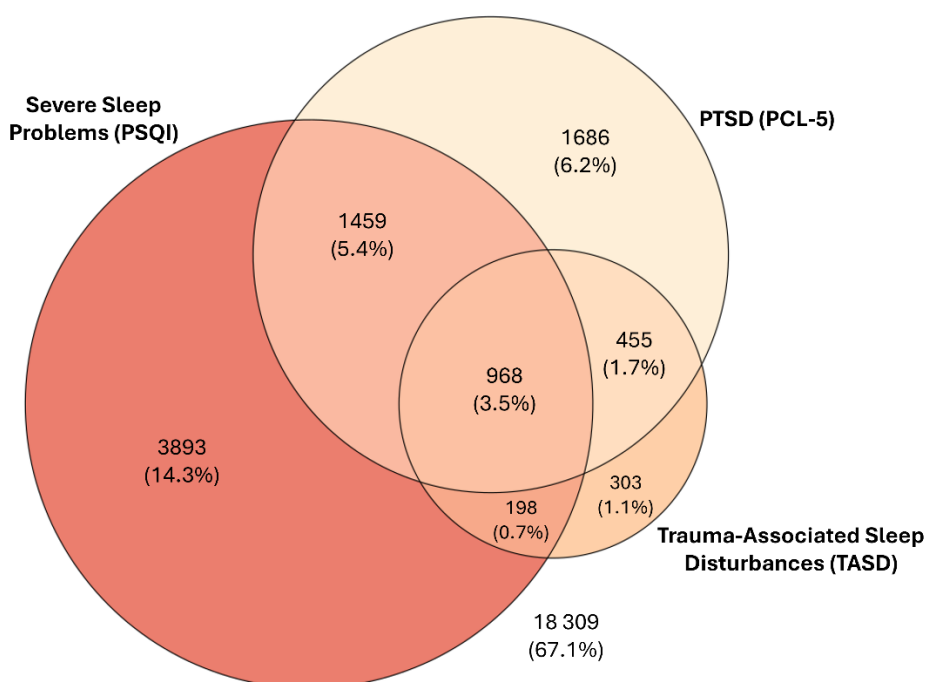

**Figure S5.** Venn diagram illustrating the overlapping prevalence of TASP, severe sleep problems assessed by the Pittsburgh Sleep Quality Index (PSQI), and probable PTSD as measured by the PTSD Checklist for DSM-5 (PCL-5), with area sizes proportional to the number of cases in each category.

**Table S1** – Worst life stressor items

| No. | Item name                                              | Further description                                                                                                                                                                                                                        |
|-----|--------------------------------------------------------|--------------------------------------------------------------------------------------------------------------------------------------------------------------------------------------------------------------------------------------------|
| 1.  | Natural disaster, fire, explosion, or serious accident | Natural disaster (e.g., flood, hurricane, tornado, earthquake), fire, explosion, transportation accident (e.g., car accident, boat accident, train wreck, plane crash), or serious accident at work, home, or during recreational activity |
| 2.  | Physical violence                                      | Physical assault (e.g., being attacked, hit, slapped, kicked, beaten up) or assault with a weapon (e.g., being shot, stabbed, threatened with a knife, gun, bomb)                                                                          |
| 3.  | Sexual violence                                        | Sexual assault (e.g., rape, attempted rape, made to perform any type of sexual act through force or threat of harm)                                                                                                                        |
| 4.  | Other unwanted sexual experience                       | Other unwanted or uncomfortable sexual experience                                                                                                                                                                                          |
| 5.  | Combat, or war-zone                                    | Combat, or exposure to a war-zone (in the military or as a civilian)                                                                                                                                                                       |
| 6.  | Captivity                                              | Loss of freedom (e.g., kidnapping, abduction, taken hostage, prisoner of war)                                                                                                                                                              |
| 7.  | Life-threatening illness or injury                     |                                                                                                                                                                                                                                            |
| 8.  | Sudden violent death                                   | Sudden violent death (e.g., murder, suicide)                                                                                                                                                                                               |
| 9.  | Sudden death due to accident                           |                                                                                                                                                                                                                                            |
| 10. | Serious injury/harm/death to other                     | Serious injury, harm or death that you caused someone else                                                                                                                                                                                 |
| 11. | Bullying                                               | Bullying (repeated reprehensible behaviour of a person or a group, intended to frighten, hurt, or intimidate others)                                                                                                                       |
| 12. | Discrimination/humiliation                             | Discrimination (e.g., prejudice because of race or sexual orientation), public humiliation on social media or in the press, or other humiliating experience                                                                                |
| 13. | Divorce/breakup                                        |                                                                                                                                                                                                                                            |
| 14. | Adultery/rejection                                     | Adultery/rejection by spouse                                                                                                                                                                                                               |
| 15. | Child taken away from you                              |                                                                                                                                                                                                                                            |
| 16. | Child with serious disability                          | Having a child with a serious physical or mental disability (e.g., impaired development, birth defect, impaired vision, hearing, or walking)                                                                                               |
| 17. | Stillbirth                                             |                                                                                                                                                                                                                                            |
| 18. | Other difficult birth experience                       |                                                                                                                                                                                                                                            |
| 19. | Other experience                                       | Open ended question on other stressful/traumatizing experience.                                                                                                                                                                            |

**Table S2.** Age adjusted and multivariate adjusted logistic regression models in complete case analysis, missing values, and pooled data analysis after multiple imputation.

|                                     | TASD<br>n(%) | Complete cases<br>(n=20 464) |                         | Missing values* as category<br>(n=27 333) |                         | Pooled data after multiple imputation<br>(n=27 333) |                         |
|-------------------------------------|--------------|------------------------------|-------------------------|-------------------------------------------|-------------------------|-----------------------------------------------------|-------------------------|
|                                     |              | Age adj. PR                  | Multivariate adj.<br>PR | Age adj. PR                               | Multivariate adj.<br>PR | Age adj. PR                                         | Multivariate adj.<br>PR |
| Age Categories <sup>a,b</sup>       |              |                              |                         |                                           |                         |                                                     |                         |
| 60–69                               | 182 (4.4%)   | Ref.                         | Ref.                    | Ref.                                      | Ref.                    | Ref.                                                | Ref.                    |
| 50–59                               | 323 (5.2%)   | 1.08 (0.88–1.33)             | 1.12 (0.90–1.40)        | 1.17 (0.98–1.40)                          | 1.19 (0.99–1.43)        | 1.17 (0.98–1.40)                                    | <b>1.21 (1.00–1.46)</b> |
| 40–49                               | 349 (5.7%)   | 1.08 (0.88–1.34)             | 1.22 (0.97–1.52)        | <b>1.28 (1.08–1.53)</b>                   | <b>1.39 (1.15–1.67)</b> | <b>1.28 (1.08–1.53)</b>                             | <b>1.40 (1.16–1.69)</b> |
| 30–39                               | 421 (7.5%)   | <b>1.66 (1.36–2.03)</b>      | <b>1.88 (1.51–2.33)</b> | <b>1.69 (1.42–2.00)</b>                   | <b>1.87 (1.56–2.25)</b> | <b>1.69 (1.42–2.00)</b>                             | <b>1.89 (1.57–2.28)</b> |
| 18–29                               | 651 (12.3%)  | <b>2.72 (2.25–3.28)</b>      | <b>2.49 (1.99–3.12)</b> | <b>2.78 (2.37–3.26)</b>                   | <b>2.54 (2.12–3.05)</b> | <b>2.78 (2.37–3.26)</b>                             | <b>2.59 (2.14–3.14)</b> |
| Relationship Status <sup>b</sup>    |              |                              |                         |                                           |                         |                                                     |                         |
| Married or in a relationship        | 1230 (6.0%)  | Ref.                         | Ref.                    | Ref.                                      | Ref.                    | Ref.                                                | Ref.                    |
| Single or widowed                   | 674 (10.3%)  | <b>1.65 (1.47–1.85)</b>      | <b>1.28 (1.15–1.43)</b> | <b>1.61 (1.47–1.77)</b>                   | <b>1.25 (1.14–1.36)</b> | <b>1.61 (1.46–1.77)</b>                             | <b>1.25 (1.14–1.37)</b> |
| Unknown                             | 22           | -                            | -                       | <b>2.32 (1.56–3.43)</b>                   | 1.19 (0.82–1.73)        | -                                                   | -                       |
| Education <sup>b</sup>              |              |                              |                         |                                           |                         |                                                     |                         |
| Tertiary level B                    | 222 (3.6%)   | Ref.                         | Ref.                    | Ref.                                      | Ref.                    | Ref.                                                | Ref.                    |
| Tertiary level A                    | 417 (4.8%)   | <b>1.39 (1.14–1.68)</b>      | 1.12 (0.92–1.36)        | <b>1.33 (1.13–1.56)</b>                   | 1.11 (0.94–1.31)        | <b>1.31 (1.11–1.54)</b>                             | 1.12 (0.93–1.34)        |
| Secondary                           | 751 (8.9%)   | <b>2.45 (2.04–2.94)</b>      | <b>1.41 (1.15–1.71)</b> | <b>2.36 (2.03–2.75)</b>                   | <b>1.44 (1.23–1.69)</b> | <b>2.32 (1.98–2.72)</b>                             | <b>1.45 (1.19–1.76)</b> |
| Primary                             | 518 (13.1%)  | <b>3.93 (3.26–4.74)</b>      | <b>1.67 (1.35–2.05)</b> | <b>3.61 (3.09–4.21)</b>                   | <b>1.64 (1.38–1.95)</b> | <b>3.55 (3.01–4.18)</b>                             | <b>1.66 (1.34–2.05)</b> |
| Unknown                             | 18           | -                            | -                       | <b>5.51 (3.56–8.53)</b>                   | <b>2.28 (1.50–3.45)</b> | -                                                   | -                       |
| Personal Income <sup>b</sup>        |              |                              |                         |                                           |                         |                                                     |                         |
| ≥5601 EUR                           | 111 (3.0%)   | Ref.                         | Ref.                    | Ref.                                      | Ref.                    | Ref.                                                | Ref.                    |
| 4001–5600 EUR                       | 243 (3.9%)   | <b>1.36 (1.04–1.78)</b>      | 1.18 (0.90–1.54)        | <b>1.27 (1.02–1.58)</b>                   | 1.10 (0.88–1.37)        | 1.16 (0.89–1.50)                                    | 1.04 (0.81–1.32)        |
| 2401–4000 EUR                       | 513 (6.3%)   | <b>2.30 (1.80–2.95)</b>      | <b>1.41 (1.09–1.83)</b> | <b>1.96 (1.59–2.40)</b>                   | 1.20 (0.97–1.49)        | <b>1.73 (1.32–2.27)</b>                             | 1.11 (0.83–1.49)        |
| 1201–2400 EUR                       | 771 (12.3%)  | <b>4.14 (3.24–5.30)</b>      | <b>1.59 (1.21–2.08)</b> | <b>3.63 (2.97–4.44)</b>                   | <b>1.45 (1.17–1.81)</b> | <b>3.18 (2.35–4.30)</b>                             | 1.35 (0.96–1.90)        |
| <1200 EUR                           | 203 (10.9%)  | <b>3.19 (2.38–4.26)</b>      | <b>1.64 (1.22–2.22)</b> | <b>2.67 (2.10–3.38)</b>                   | <b>1.41 (1.10–1.80)</b> | <b>2.32 (1.60–3.36)</b>                             | 1.31 (0.89–1.94)        |
| Unknown                             | 85           | -                            | -                       | <b>2.53 (1.92–3.32)</b>                   | <b>1.56 (1.18–2.06)</b> | -                                                   | -                       |
| Employment Status <sup>b</sup>      |              |                              |                         |                                           |                         |                                                     |                         |
| Employed/studying                   | 1245 (5.6%)  | Ref.                         | Ref.                    | Ref.                                      | Ref.                    | Ref.                                                | Ref.                    |
| Unemployed                          | 56 (11.8%)   | <b>2.21 (1.65–2.97)</b>      | <b>1.46 (1.09–1.94)</b> | <b>1.93 (1.50–2.48)</b>                   | <b>1.30 (1.02–1.66)</b> | <b>1.92 (1.49–2.46)</b>                             | <b>1.31 (1.03–1.69)</b> |
| Staying at home/<br>maternity leave | 50 (5.1%)    | 0.75 (0.53–1.06)             | 0.82 (0.58–1.14)        | <b>0.74 (0.56–0.98)</b>                   | 0.79 (0.60–1.04)        | <b>0.74 (0.56–0.98)</b>                             | 0.80 (0.61–1.05)        |
| On disability                       | 408 (18.9%)  | <b>4.74 (4.17–5.38)</b>      | <b>2.00 (1.72–2.33)</b> | <b>4.41 (3.98–4.89)</b>                   | <b>1.94 (1.71–2.19)</b> | <b>4.36 (3.91–4.85)</b>                             | <b>1.93 (1.69–2.21)</b> |
| Sick leave                          | 107 (15.4%)  | <b>3.02 (2.41–3.79)</b>      | <b>1.69 (1.35–2.11)</b> | <b>2.98 (2.50–3.57)</b>                   | <b>1.74 (1.46–2.08)</b> | <b>2.96 (2.48–3.54)</b>                             | <b>1.75 (1.46–2.09)</b> |
| Retired                             | 31 (3.8%)    | <b>1.55 (1.02–2.36)</b>      | 1.16 (0.76–1.75)        | 1.36 (0.93–1.99)                          | 1.11 (0.76–1.61)        | 1.51 (0.97–2.35)                                    | 1.19 (0.80–1.78)        |

|                                                        |             |                     |                    |                     |                    |                     |                    |
|--------------------------------------------------------|-------------|---------------------|--------------------|---------------------|--------------------|---------------------|--------------------|
| Unknown                                                | 29          | -                   | -                  | 2.90 (2.11–4.00)    | 1.78 (1.31–2.41)   | -                   | -                  |
| <b>Smoking<sup>b</sup></b>                             |             |                     |                    |                     |                    |                     |                    |
| Never                                                  | 607 (5.0%)  | Ref.                | Ref.               | Ref.                | Ref.               | Ref.                | Ref.               |
| Previous smoker                                        | 644 (6.7%)  | 1.80 (1.58–2.05)    | 1.20 (1.05–1.37)   | 1.63 (1.46–1.82)    | 1.10 (0.98–1.23)   | 1.60 (1.37–1.86)    | 1.10 (0.95–1.28)   |
| Non-daily                                              | 153 (10.0%) | 2.22 (1.82–2.70)    | 1.54 (1.27–1.87)   | 1.94 (1.64–2.30)    | 1.38 (1.17–1.63)   | 1.95 (1.49–2.55)    | 1.41 (1.10–1.80)   |
| Daily                                                  | 391 (15.7%) | 3.99 (3.46–4.60)    | 1.68 (1.44–1.95)   | 3.45 (3.06–3.88)    | 1.52 (1.34–1.72)   | 3.17 (2.49–4.09)    | 1.54 (1.21–1.95)   |
| Unknown                                                | 131         | -                   | -                  | 1.56 (1.30–1.86)    | 1.18 (1.00–1.40)   | -                   | -                  |
| <b>Binge Drinking in the Past Year<sup>b</sup></b>     |             |                     |                    |                     |                    |                     |                    |
| Never                                                  | 714 (5.8%)  | Ref.                | Ref.               | Ref.                | Ref.               | Ref.                | Ref.               |
| Less than once a month                                 | 688 (6.9%)  | 1.05 (0.93–1.18)    | 1.16 (1.03–1.31)   | 0.99 (0.89–1.10)    | 1.11 (1.00–1.23)   | 0.96 (0.83–1.11)    | 1.07 (0.93–1.23)   |
| Monthly                                                | 261 (9.9%)  | 1.37 (1.16–1.62)    | 1.37 (1.17–1.61)   | 1.30 (1.14–1.50)    | 1.34 (1.17–1.53)   | 1.25 (1.06–1.48)    | 1.28 (1.09–1.50)   |
| Once or more a week                                    | 127 (13.1%) | 2.04 (1.65–2.53)    | 1.63 (1.33–2.01)   | 1.91 (1.60–2.28)    | 1.53 (1.29–1.81)   | 1.72 (1.34–2.20)    | 1.43 (1.12–1.81)   |
| Unknown                                                | 136         | -                   | -                  | 2.22 (1.02–1.45)    | 1.18 (1.00–1.39)   | -                   | -                  |
| <b>No. of LEC-5 Worst Life Stressors<sup>c</sup></b>   |             |                     |                    |                     |                    |                     |                    |
| 0                                                      | 53 (1.4%)   | Ref.                | Ref.               | Ref.                | Ref.               | Ref.                | Ref.               |
| 1                                                      | 151 (2.5%)  | 1.91 (1.30–2.80)    | 1.82 (1.24–2.66)   | 1.82 (1.33–2.48)    | 1.74 (1.28–2.38)   | 1.82 (1.33–2.48)    | 1.75 (1.28–2.38)   |
| 2–3                                                    | 675 (6.2%)  | 4.90 (3.48–6.90)    | 4.35 (3.09–6.11)   | 4.54 (3.44–5.99)    | 4.06 (3.08–5.35)   | 4.54 (3.44–5.99)    | 4.08 (3.10–5.38)   |
| 4–5                                                    | 673 (13.6%) | 11.23 (7.99–15.79)  | 8.55 (6.07–12.05)  | 10.09 (7.65–13.30)  | 7.81 (5.92–10.31)  | 10.09 (7.65–13.30)  | 7.89 (5.98–10.42)  |
| ≥6                                                     | 374 (26.2%) | 22.40 (15.83–31.69) | 13.81 (9.71–19.65) | 20.21 (15.26–26.76) | 12.97 (9.75–17.26) | 20.21 (15.26–26.77) | 13.15 (9.88–17.50) |
| <b>Worst LEC-5 Life Stressors<sup>b</sup></b>          |             |                     |                    |                     |                    |                     |                    |
| Natural disaster, fire, explosion, or serious accident | 60 (4.2%)   | Ref.                | Ref.               | Ref.                | Ref.               | Ref.                | Ref.               |
| Physical violence                                      | 166 (11.9%) | 3.48 (2.40–5.06)    | 2.38 (1.65–3.44)   | 2.67 (2.01–3.55)    | 1.85 (1.40–2.43)   | 2.67 (2.01–3.55)    | 1.86 (1.41–2.45)   |
| Sexual violence                                        | 692 (18.1%) | 4.89 (3.48–6.89)    | 3.24 (2.31–4.55)   | 3.75 (2.90–4.84)    | 2.44 (1.90–3.13)   | 3.75 (2.90–4.84)    | 2.46 (1.91–3.16)   |
| Other unwanted sexual experience                       | 95 (5.4%)   | 1.35 (0.90–2.05)    | 1.52 (1.01–2.29)   | 1.17 (0.86–1.61)    | 1.31 (0.96–1.77)   | 1.17 (0.86–1.61)    | 1.31 (0.96–1.78)   |
| Combat or war-zone                                     | 3 (12.5%)   | 3.53 (1.01–12.40)   | 3.96 (1.34–11.66)  | 2.88 (1.01–8.18)    | 3.34 (1.26–8.82)   | 2.88 (1.01–8.18)    | 3.28 (1.22–8.77)   |
| Captivity                                              | 14 (17.3%)  | 3.98 (1.98–8.01)    | 2.14 (1.11–4.15)   | 3.70 (2.20–6.21)    | 2.03 (1.24–3.31)   | 3.70 (2.20–6.21)    | 2.03 (1.24–3.32)   |
| Life-threatening illness or injury                     | 221 (6.2%)  | 1.74 (1.21–2.51)    | 1.63 (1.13–2.35)   | 1.54 (1.17–2.03)    | 1.48 (1.13–1.94)   | 1.54 (1.17–2.03)    | 1.49 (1.13–1.96)   |
| Sudden violent death                                   | 99 (8.8%)   | 2.52 (1.68–3.76)    | 2.09 (1.40–3.11)   | 2.05 (1.50–2.79)    | 1.68 (1.24–2.27)   | 2.05 (1.50–2.79)    | 1.69 (1.25–2.29)   |
| Sudden death due to accident                           | 86 (6.7%)   | 1.98 (1.31–3.01)    | 1.92 (1.27–2.88)   | 1.69 (1.23–2.33)    | 1.56 (1.15–2.12)   | 1.69 (1.23–2.33)    | 1.58 (1.16–2.15)   |
| Serious injury/harm/death to other                     | 3 (8.8%)    | 4.43 (1.42–13.88)   | 3.24 (0.99–10.61)  | 2.00 (0.64–6.25)    | 1.50 (0.47–4.81)   | 2.00 (0.64–6.25)    | 1.53 (0.48–4.90)   |
| Other experience                                       | 171 (5.2%)  | 1.63 (1.12–2.36)    | 1.55 (1.07–2.26)   | 1.23 (0.93–1.64)    | 1.21 (0.91–1.60)   | 1.23 (0.93–1.64)    | 1.21 (0.91–1.82)   |
| <b>Other Worst Life Stressors<sup>b</sup></b>          |             |                     |                    |                     |                    |                     |                    |

|                                                                    |              |                            |                            |                            |                           |                            |                           |
|--------------------------------------------------------------------|--------------|----------------------------|----------------------------|----------------------------|---------------------------|----------------------------|---------------------------|
| Bullying                                                           | 68 (3.1%)    | 0.80 (0.52–1.25)           | 0.94 (0.61–1.46)           | <b>0.67 (0.48–0.95)</b>    | 0.80 (0.57–1.11)          | <b>0.67 (0.48–0.95)</b>    | 0.80 (0.58–1.12)          |
| Discrimination/humiliation                                         | 43 (4.3%)    | 1.07 (0.64–1.80)           | 1.08 (0.65–1.81)           | 1.00 (0.68–1.46)           | 1.01 (0.70–1.48)          | 1.00 (0.68–1.46)           | 1.01 (0.69–1.48)          |
| Divorce/breakup                                                    | 56 (2.9%)    | 0.76 (0.48–1.21)           | 0.97 (0.61–1.54)           | <b>0.67 (0.47–0.96)</b>    | 0.85 (0.60–1.21)          | <b>0.67 (0.47–0.96)</b>    | 0.86 (0.60–1.22)          |
| Adultery/rejection                                                 | 38 (2.3%)    | 0.65 (0.39–1.08)           | 0.76 (0.46–1.26)           | <b>0.54 (0.36–0.81)</b>    | <b>0.63 (0.43–0.94)</b>   | <b>0.54 (0.36–0.81)</b>    | <b>0.64 (0.43–0.95)</b>   |
| Child taken away from you                                          | 9 (10.8%)    | <b>3.36 (1.37–8.22)</b>    | 1.25 (0.54–2.93)           | <b>2.67 (1.38–5.17)</b>    | 1.06 (0.56–2.01)          | <b>2.67 (1.38–5.17)</b>    | 1.07 (0.56–2.02)          |
| Child with serious disability                                      | 24 (4.0%)    | 1.20 (0.66–2.18)           | 1.15 (0.63–2.08)           | 1.06 (0.67–1.69)           | 1.06 (0.67–1.67)          | 1.06 (0.67–1.69)           | 1.06 (0.67–1.67)          |
| Stillbirth                                                         | 21 (8.0%)    | <b>2.38 (1.32–4.30)</b>    | <b>2.81 (1.59–4.97)</b>    | <b>1.99 (1.23–3.20)</b>    | <b>2.39 (1.52–3.76)</b>   | <b>1.99 (1.23–3.20)</b>    | <b>2.42 (1.54–3.82)</b>   |
| Other difficult birth experience                                   | 8 (1.2%)     | <b>0.32 (0.14–0.79)</b>    | 0.49 (0.21–1.17)           | <b>0.27 (0.13–0.55)</b>    | <b>0.40 (0.19–0.82)</b>   | <b>0.27 (0.13–0.55)</b>    | <b>0.40 (0.19–0.82)</b>   |
| <b>Occurrence of Worst Life Stressor<sup>c</sup></b>               |              |                            |                            |                            |                           |                            |                           |
| Once                                                               | 536 (5.0%)   | Ref.                       | Ref.                       | Ref.                       | Ref.                      | Ref.                       | Ref.                      |
| More than once                                                     | 1359 (8.5%)  | <b>1.93 (1.71–2.17)</b>    | <b>1.60 (1.42–1.80)</b>    | <b>1.78 (1.62–1.96)</b>    | <b>1.49 (1.35–1.64)</b>   | <b>1.77 (1.60–1.96)</b>    | <b>1.49 (1.34–1.65)</b>   |
| Unknown                                                            | 31           | -                          | -                          | 0.93 (0.65–1.33)           | 0.91 (0.54–1.52)          | -                          | -                         |
| <b>Temporal Proximity to Worst Life Stressor<sup>a,d</sup></b>     |              |                            |                            |                            |                           |                            |                           |
| ≥20 years                                                          | 399 (5.2%)   | Ref.                       | Ref.                       | Ref.                       | Ref.                      | Ref.                       | Ref.                      |
| 10–19 years                                                        | 326 (5.8%)   | 1.10 (0.93–1.30)           | <b>1.19 (1.01–1.41)</b>    | 1.11 (0.96–1.28)           | <b>1.19 (1.04–1.37)</b>   | 1.12 (0.96–1.30)           | <b>1.19 (1.02–1.39)</b>   |
| 5–9 years                                                          | 322 (7.7%)   | <b>1.47 (1.24–1.74)</b>    | <b>1.49 (1.27–1.76)</b>    | <b>1.47 (1.27–1.69)</b>    | <b>1.50 (1.31–1.72)</b>   | <b>1.47 (1.26–1.72)</b>    | <b>1.50 (1.28–1.76)</b>   |
| 2–4 years                                                          | 371 (8.9%)   | <b>1.69 (1.43–1.99)</b>    | <b>1.66 (1.42–1.95)</b>    | <b>1.70 (1.49–1.95)</b>    | <b>1.67 (1.47–1.90)</b>   | <b>1.70 (1.46–1.98)</b>    | <b>1.67 (1.43–1.95)</b>   |
| 0–1 year                                                           | 452 (9.9%)   | <b>1.90 (1.62–2.22)</b>    | <b>1.86 (1.59–2.16)</b>    | <b>1.89 (1.66–2.15)</b>    | <b>1.84 (1.63–2.09)</b>   | <b>1.85 (1.54–2.23)</b>    | <b>1.81 (1.51–2.17)</b>   |
| Unknown                                                            | 56           | -                          | -                          | 0.93 (0.71–1.22)           | 1.06 (0.81–1.38)          | -                          | -                         |
| <b>Age at Worst Life Stressor (First Occurrence)<sup>a,d</sup></b> |              |                            |                            |                            |                           |                            |                           |
| Adulthood (age ≥40)                                                | 81 (4.5%)    | Ref.                       | Ref.                       | Ref.                       | Ref.                      | Ref.                       | Ref.                      |
| Young adulthood (age 20–39)                                        | 343 (6.8%)   | <b>1.51 (1.15–1.98)</b>    | <b>1.53 (1.17–2.01)</b>    | <b>1.51 (1.19–1.91)</b>    | <b>1.50 (1.18–1.90)</b>   | 1.06 (0.58–1.94)           | 1.05 (0.62–1.76)          |
| Adolescence (age 13–19)                                            | 373 (10.9%)  | <b>2.38 (1.81–3.13)</b>    | <b>1.98 (1.51–2.61)</b>    | <b>2.42 (1.92–3.06)</b>    | <b>1.94 (1.54–2.45)</b>   | 1.62 (0.85–3.09)           | 1.31 (0.76–2.27)          |
| Childhood (age 4–12)                                               | 470 (9.9%)   | <b>2.25 (1.72–2.94)</b>    | <b>2.27 (1.73–2.98)</b>    | <b>2.19 (1.74–2.76)</b>    | <b>2.14 (1.69–2.69)</b>   | 1.34 (0.60–2.97)           | 1.32 (0.65–2.67)          |
| Infancy/Toddlerhood (age 0–3)                                      | 73 (14.4%)   | <b>2.75 (1.89–4.00)</b>    | <b>2.23 (1.53–3.23)</b>    | <b>3.20 (2.37–4.33)</b>    | <b>2.48 (1.84–3.35)</b>   | 1.61 (0.60–4.29)           | 1.43 (0.63–3.24)          |
| Unknown                                                            | 586          | -                          | -                          | 1.11 (0.88–1.39)           | <b>1.48 (1.18–1.86)</b>   | -                          | -                         |
| <b>Probable PTSD<sup>c</sup></b>                                   |              |                            |                            |                            |                           |                            |                           |
| No                                                                 | 502 (2.2%)   | Ref.                       | Ref.                       | Ref.                       | Ref.                      | Ref.                       | Ref.                      |
| Yes                                                                | 1424 (31.1%) | <b>13.86 (13.17–16.76)</b> | <b>12.21 (10.71–13.93)</b> | <b>13.30 (12.06–14.67)</b> | <b>11.00 (9.88–12.23)</b> | <b>13.30 (12.06–14.67)</b> | <b>11.07 (9.94–12.32)</b> |
| <b>Severe Sleep Problems<sup>c</sup></b>                           |              |                            |                            |                            |                           |                            |                           |
| No                                                                 | 758 (3.7%)   | Ref.                       | Ref.                       | Ref.                       | Ref.                      | Ref.                       | Ref.                      |
| Yes                                                                | 1166 (17.9%) | <b>5.53 (4.97–6.15)</b>    | <b>4.09 (3.64–4.59)</b>    | <b>4.93 (4.53–5.38)</b>    | <b>3.69 (3.36–4.05)</b>   | <b>4.93 (4.52–5.37)</b>    | <b>3.71 (3.37–4.08)</b>   |
| Unknown                                                            | 2            | -                          | -                          | 1.13 (0.29–4.43)           | 0.83 (0.21–3.20)          | -                          | -                         |
| <b>Depressive Symptoms<sup>c</sup></b>                             |              |                            |                            |                            |                           |                            |                           |
| Mild/moderate                                                      | 451 (2.5%)   | Ref.                       | Ref.                       | Ref.                       | Ref.                      | Ref.                       | Ref.                      |

|                                      |             |                            |                          |                            |                         |                          |                         |
|--------------------------------------|-------------|----------------------------|--------------------------|----------------------------|-------------------------|--------------------------|-------------------------|
| Moderately severe                    | 927 (13.9%) | <b>6.07 (5.31–6.94)</b>    | <b>4.90 (4.26–5.64)</b>  | <b>5.27 (4.71–5.89)</b>    | <b>4.26 (3.79–4.78)</b> | <b>4.94 (4.23–5.77)</b>  | <b>4.00 (3.40–4.71)</b> |
| Severe                               | 455 (32.3%) | <b>14.01 (12.08–16.26)</b> | <b>9.47 (8.02–11.18)</b> | <b>11.89 (10.52–13.43)</b> | <b>7.87 (6.86–9.02)</b> | <b>9.66 (7.67–12.17)</b> | <b>6.70 (5.30–8.46)</b> |
| Unknown                              | 93          | -                          | -                        | <b>2.95 (2.38–3.66)</b>    | <b>2.55 (2.06–3.15)</b> | -                        | -                       |
| <b>Suicidal Ideation<sup>c</sup></b> |             |                            |                          |                            |                         |                          |                         |
| No                                   | 1034 (4.7%) | Ref.                       | Ref.                     | Ref.                       | Ref.                    | Ref.                     | Ref.                    |
| Yes                                  | 769 (19.5%) | <b>3.84 (3.44–4.29)</b>    | <b>2.69 (2.39–3.02)</b>  | <b>3.62 (3.30–3.97)</b>    | <b>2.56 (2.33–2.82)</b> | <b>2.30 (2.79–3.89)</b>  | <b>2.42 (2.05–2.86)</b> |
| Unknown                              | 123         | -                          | -                        | <b>1.58 (1.32–1.90)</b>    | <b>1.37 (1.15–1.64)</b> | -                        | -                       |
| <b>Suicidal Attempts<sup>c</sup></b> |             |                            |                          |                            |                         |                          |                         |
| No                                   | 1361 (5.9%) | Ref.                       | Ref.                     | Ref.                       | Ref.                    | Ref.                     | Ref.                    |
| Yes                                  | 216 (36.8%) | <b>4.82 (4.15–5.59)</b>    | <b>2.67 (2.28–3.14)</b>  | <b>4.77 (4.19–5.43)</b>    | <b>2.69 (2.35–3.09)</b> | <b>2.49 (1.66–3.74)</b>  | <b>1.84 (1.32–2.58)</b> |
| Unknown                              | 349         | -                          | -                        | <b>1.42 (1.26–1.60)</b>    | <b>1.31 (1.17–1.47)</b> | -                        | -                       |
| <b>Self-Harm<sup>c</sup></b>         |             |                            |                          |                            |                         |                          |                         |
| No                                   | 1308 (5.5%) | Ref.                       | Ref.                     | Ref.                       | Ref.                    | Ref.                     | Ref.                    |
| Yes                                  | 500 (23.8%) | <b>4.59 (4.02–5.23)</b>    | <b>2.91 (2.54–3.34)</b>  | <b>3.54 (3.18–3.94)</b>    | <b>2.46 (2.21–2.75)</b> | <b>3.04 (2.42–3.83)</b>  | <b>2.25 (1.82–2.77)</b> |
| Unknown                              | 118         | -                          | -                        | <b>1.45 (1.21–1.74)</b>    | <b>1.28 (1.08–1.52)</b> | -                        | -                       |
| <b>Anxiety Symptoms<sup>c</sup></b>  |             |                            |                          |                            |                         |                          |                         |
| Minimal/mild                         | 678 (3.4%)  | Ref.                       | Ref.                     | Ref.                       | Ref.                    | Ref.                     | Ref.                    |
| Moderate                             | 522 (14.6%) | <b>4.61 (4.03–5.27)</b>    | <b>3.71 (3.24–4.26)</b>  | <b>4.09 (3.66–4.57)</b>    | <b>3.32 (2.97–3.72)</b> | <b>3.88 (3.36–4.50)</b>  | <b>3.19 (2.73–3.72)</b> |
| Severe                               | 634 (26.0%) | <b>8.05 (7.09–9.14)</b>    | <b>5.85 (5.11–6.70)</b>  | <b>7.10 (6.39–7.89)</b>    | <b>5.15 (4.60–5.76)</b> | <b>6.15 (5.10–7.42)</b>  | <b>4.61 (3.77–5.64)</b> |
| Unknown                              | 92          | -                          | -                        | <b>2.17 (1.76–2.68)</b>    | <b>1.89 (1.54–2.32)</b> | -                        | -                       |

\* Missing values are both “can/will not answer” or not available.

<sup>a</sup> Prevalence ratio (PR) are presented as crude instead as age adjusted. <sup>b</sup> Adjusted for age, marital status, education, personal income, employment status, no. of LEC-5 life stressors, and temporal proximity to worst life stressor. <sup>c</sup> Adjusted for age, marital status, education, personal income, employment status, and temporal proximity to worst life stressor.

<sup>d</sup> Adjusted for marital status, education, personal income, employment status, no. of LEC-5 life stressors, and temporal proximity to worst life stressor.



**Table S3.** The stratified analysis by age groups on the association between TASD and sociodemographic characteristics, health-related behaviors, trauma-related outcomes, and psychopathologies, using complete cases with multivariate adjustment.

|                                                           | Age 18–39<br>(n=7599)      | Age 40–59<br>(n=9695)    | Age 60–69<br>(n=3170)     | Effect<br>Modifica<br>tion Test<br>(p) |
|-----------------------------------------------------------|----------------------------|--------------------------|---------------------------|----------------------------------------|
|                                                           | RR (95% CI)                | RR (95% CI)              | RR (95% CI)               |                                        |
| <b>Relationship Status</b>                                |                            |                          |                           | 0.27                                   |
| Married or in a relationship                              | Ref.                       | Ref.                     | Ref.                      |                                        |
| Single or widowed                                         | <b>1.37 (1.20–1.58)</b>    | <b>1.28 (1.06–1.54)</b>  | 1.01 (0.72–1.43)          |                                        |
| <b>Education</b>                                          |                            |                          |                           | 0.00                                   |
| Tertiary level B                                          | Ref.                       | Ref.                     | Ref.                      |                                        |
| Tertiary level A                                          | 0.86 (0.65–1.15)           | 0.86 (0.65–1.15)         | 1.27 (0.72–2.24)          |                                        |
| Secondary                                                 | <b>1.49 (1.15–1.93)</b>    | <b>1.48 (1.09–1.99)</b>  | 1.11 (0.64–1.91)          |                                        |
| Primary                                                   | <b>1.99 (1.53–2.59)</b>    | <b>1.58 (1.14–2.21)</b>  | 0.99 (0.55–1.79)          |                                        |
| <b>Personal Income</b>                                    |                            |                          |                           | 0.11                                   |
| ≥5601 EUR                                                 | Ref.                       | Ref.                     | Ref.                      |                                        |
| 4001–5600 EUR                                             | 1.00 (0.65–1.52)           | <b>1.58 (1.07–2.34)</b>  | 0.53 (0.25–1.11)          |                                        |
| 2401–4000 EUR                                             | <b>1.49 (1.15–1.93)</b>    | <b>1.77 (1.22–2.58)</b>  | 0.77 (0.41–1.43)          |                                        |
| 1201–2400 EUR                                             | <b>1.56 (1.06–2.28)</b>    | <b>2.04 (1.39–3.00)</b>  | 0.86 (0.47–1.60)          |                                        |
| <1200 EUR                                                 | <b>1.61 (1.08–2.40)</b>    | <b>2.01 (1.07–3.77)</b>  | 1.89 (0.84–4.26)          |                                        |
| <b>Employment Status*</b>                                 |                            |                          |                           | 0.00                                   |
| Employed/studying                                         | Ref.                       | Ref.                     | Ref.                      |                                        |
| Unemployed                                                | <b>1.49 (1.08–2.05)</b>    | 1.41 (0.75–2.63)         | ~                         |                                        |
| Staying at home/maternity<br>leave/sick leave/retired     | 1.02 (0.81–1.30)           | <b>1.86 (1.34–2.59)</b>  | 1.18 (0.76–1.83)          |                                        |
| On disability                                             | <b>1.62 (1.32–1.98)</b>    | <b>1.94 (1.57–2.40)</b>  | <b>2.51 (1.73–3.66)</b>   |                                        |
| <b>Smoking</b>                                            |                            |                          |                           | 0.29                                   |
| Never                                                     | Ref.                       | Ref.                     | Ref.                      |                                        |
| Previous smoker                                           | <b>1.26 (1.09–1.53)</b>    | 1.04 (0.84–1.30)         | 1.15 (0.77–1.73)          |                                        |
| Non-daily                                                 | <b>1.47 (1.16–1.85)</b>    | <b>1.72 (1.21–2.46)</b>  | 1.53 (0.69–3.40)          |                                        |
| Daily                                                     | <b>1.54 (1.28–1.86)</b>    | <b>1.66 (1.30–2.14)</b>  | <b>2.04 (1.26–3.30)</b>   |                                        |
| <b>Binge Drinking in the Past Year</b>                    |                            |                          |                           | 0.18                                   |
| Never                                                     | Ref.                       | Ref.                     | Ref.                      |                                        |
| Less than once a month                                    | <b>1.19 (1.01–1.41)</b>    | 1.15 (0.94–1.40)         | 1.26 (0.88–1.81)          |                                        |
| Monthly                                                   | <b>1.48 (1.21–1.80)</b>    | <b>1.47 (1.07–2.01)</b>  | 0.46 (0.15–1.42)          |                                        |
| Once or more a week                                       | <b>1.51 (1.14–2.00)</b>    | <b>2.18 (1.60–2.97)</b>  | 1.18 (0.50–2.79)          |                                        |
| <b>No. of LEC-5 Life Stressors</b>                        |                            |                          |                           | 0.17                                   |
| 0                                                         | Ref.                       | Ref.                     | Ref.                      |                                        |
| 1                                                         | <b>2.58 (1.41–4.71)</b>    | 1.25 (0.71–2.22)         | 1.62 (0.59–4.46)          |                                        |
| 2–3                                                       | <b>7.08 (4.08–12.30)</b>   | <b>2.65 (1.61–4.36)</b>  | <b>2.90 (1.16–7.21)</b>   |                                        |
| 4–5                                                       | <b>13.70 (7.89–23.81)</b>  | <b>5.23 (3.18–8.60)</b>  | <b>5.86 (2.35–14.62)</b>  |                                        |
| ≥6                                                        | <b>19.93 (11.36–34.98)</b> | <b>8.92 (5.35–14.86)</b> | <b>12.14 (4.77–30.92)</b> |                                        |
| <b>Worst LEC-5 Life Stressors*</b>                        |                            |                          |                           | 0.00                                   |
| Natural disaster, fire,<br>explosion, or serious accident | Ref.                       | Ref.                     | Ref.                      |                                        |
| Physical violence                                         | <b>2.19 (1.28–3.74)</b>    | <b>2.67 (1.49–4.79)</b>  | 2.33 (0.87–6.22)          |                                        |
| Sexual violence                                           | <b>3.22 (1.97–5.27)</b>    | <b>3.38 (1.96–5.82)</b>  | <b>2.62 (1.04–6.60)</b>   |                                        |
| Other unwanted sexual<br>experience                       | 1.14 (0.62–2.08)           | <b>2.06 (1.08–3.93)</b>  | 2.11 (0.73–6.06)          |                                        |
| Life-threatening illness or<br>injury                     | 1.59 (0.92–2.76)           | 1.70 (0.96–3.01)         | 1.51 (0.59–3.84)          |                                        |
| Sudden violent death                                      | <b>1.87 (1.04–3.34)</b>    | <b>2.56 (1.37–4.79)</b>  | 1.66 (0.55–4.98)          |                                        |
| Sudden death due to accident                              | <b>2.22 (1.23–4.01)</b>    | 1.66 (0.85–3.25)         | 1.83 (0.67–4.99)          |                                        |
| Other experience                                          | 1.40 (0.82–2.39)           | 1.58 (0.89–2.81)         | 1.25 (0.46–3.39)          |                                        |
| <b>Other Worst Life Stressors</b>                         |                            |                          |                           |                                        |
| Bullying                                                  | 0.83 (0.45–1.53)           | 1.16 (0.57–2.36)         | 0.92 (0.26–3.32)          |                                        |

|                                                       |                           |                            |                           |      |
|-------------------------------------------------------|---------------------------|----------------------------|---------------------------|------|
| Discrimination/humiliation                            | 0.83 (0.38–1.83)          | 1.10 (0.49–2.48)           | 2.19 (0.67–7.15)          |      |
| Divorce/breakup                                       | 0.59 (0.27–1.28)          | 1.41 (0.73–2.75)           | 0.98 (0.30–3.18)          |      |
| Adultery/rejection                                    | 0.76 (0.37–1.56)          | 0.84 (0.39–1.83)           | 0.50 (0.10–2.46)          |      |
| Child with serious disability                         | 0.86 (0.30–2.46)          | 1.19 (0.51–2.79)           | 1.81 (0.44–7.47)          |      |
| Stillbirth                                            | 2.20 (0.96–5.02)          | <b>3.84 (1.64–9.03)</b>    | 1.74 (0.21–14.28)         |      |
| <b>Occurrence of Worst Life Stressor</b>              |                           |                            |                           | 0.04 |
| Once                                                  | Ref.                      | Ref.                       | Ref.                      |      |
| More than once                                        | <b>1.21 (1.04–1.40)</b>   | <b>1.59 (1.28–1.97)</b>    | 0.99 (0.69–1.41)          |      |
| <b>Temporal Proximity to Worst Life Stressor</b>      |                           |                            |                           | 0.30 |
| ≥20 years                                             | Ref.                      | Ref.                       | Ref.                      |      |
| 10–19 years                                           | 1.05 (0.78–1.42)          | 1.03 (0.80–1.31)           | 1.05 (0.65–1.69)          |      |
| 5–9 years                                             | <b>1.36 (1.02–1.81)</b>   | 1.10 (0.83–1.45)           | 0.99 (0.50–1.94)          |      |
| 2–4 years                                             | <b>1.60 (1.21–2.12)</b>   | 1.06 (0.79–1.41)           | 1.32 (0.79–2.22)          |      |
| 0–1 year                                              | <b>1.74 (1.31–2.30)</b>   | 1.22 (0.94–1.58)           | <b>1.98 (1.26–3.13)</b>   |      |
| <b>Age at Worst Life Stressor (First Occurrence)*</b> |                           |                            |                           | 0.11 |
| Adulthood and young adulthood (age ≥20)               | Ref.                      | Ref.                       | Ref.                      |      |
| Adolescence (age 13–19)                               | 1.04 (0.83–1.29)          | 1.03 (0.78–1.35)           | 1.18 (0.68–2.05)          |      |
| Childhood (age 4–12)                                  | 1.01 (0.82–1.25)          | 1.20 (0.96–1.52)           | 1.48 (0.96–2.30)          |      |
| Infancy/Toddlerhood (age 0–3)                         | 0.94 (0.61–1.42)          | 1.49 (0.96–2.33)           | 1.87 (0.77–4.55)          |      |
| <b>Probable PTSD</b>                                  |                           |                            |                           | 0.52 |
| No                                                    | Ref.                      | Ref.                       | Ref.                      |      |
| Yes                                                   | <b>11.37 (9.55–13.55)</b> | <b>12.88 (10.51–15.78)</b> | <b>13.55 (9.55–19.25)</b> |      |
| <b>Severe Sleep Problems</b>                          |                           |                            |                           | 0.88 |
| No                                                    | Ref.                      | Ref.                       | Ref.                      |      |
| Yes                                                   | <b>4.08 (3.52–4.73)</b>   | <b>4.14 (3.41–5.03)</b>    | <b>3.76 (2.69–5.25)</b>   |      |
| <b>Depressive Symptoms</b>                            |                           |                            |                           | 0.15 |
| Mild/moderate                                         | Ref.                      | Ref.                       | Ref.                      |      |
| Moderately severe                                     | <b>4.50 (3.71–5.44)</b>   | <b>5.16 (4.12–6.46)</b>    | <b>5.51 (3.89–7.79)</b>   |      |
| Severe                                                | <b>8.05 (6.52–9.93)</b>   | <b>11.69 (9.07–15.07)</b>  | <b>9.73 (5.72–16.55)</b>  |      |
| <b>Suicidal Ideation</b>                              |                           |                            |                           | 0.19 |
| No                                                    | Ref.                      | Ref.                       | Ref.                      |      |
| Yes                                                   | <b>2.52 (2.19–2.91)</b>   | <b>2.88 (2.37–3.49)</b>    | <b>3.53 (2.43–5.13)</b>   |      |
| <b>Suicidal Attempts</b>                              |                           |                            |                           | 0.06 |
| No                                                    | Ref.                      | Ref.                       | Ref.                      |      |
| Yes                                                   | <b>2.62 (2.21–3.11)</b>   | <b>2.79 (1.94–4.01)</b>    | <b>6.04 (3.12–11.70)</b>  |      |
| <b>Self-Harm</b>                                      |                           |                            |                           | 0.43 |
| No                                                    | Ref.                      | Ref.                       | Ref.                      |      |
| Yes                                                   | <b>2.82 (2.44–3.27)</b>   | <b>3.27 (2.51–4.28)</b>    | <b>4.67 (1.59–13.75)</b>  |      |
| <b>Anxiety Symptoms</b>                               |                           |                            |                           | 0.62 |
| Minimal/mild                                          | Ref.                      | Ref.                       | Ref.                      |      |
| Moderate                                              | <b>3.55 (2.96–4.27)</b>   | <b>3.70 (2.96–4.63)</b>    | <b>4.31 (2.95–6.31)</b>   |      |
| Severe                                                | <b>5.42 (4.56–6.44)</b>   | <b>6.18 (5.00–7.64)</b>    | <b>7.39 (4.93–11.07)</b>  |      |

\* some subcategories from main analysis have been combined due to small numbers, ~ the event did not occur in either 'TASD' or 'no TASD' group. Effect measure modification is expressed with p-values from likelihood ratios tests.
